# Supplementary material for: Cation disorder and thermoelectric properties in layered ternary compounds MBi2Te4 (M = Ge, Sn)
Source: Royal Society of Chemistry journal article supplement (doi:10.1039/d1tc04390k), 2021-12-14
Supplement: d1tc04390k1.pdf [file d1tc04390k1.pdf]

## Supporting Information

### Cation disorder and thermoelectric properties in layered ternary compounds $\text{MBi}_2\text{Te}_4$ (M=Ge, Sn)

Hu Zhang<sup>a,b</sup>, Lu Lu<sup>c</sup>, Shaobo Mi<sup>\*a,b</sup>

<sup>a</sup>State Key Laboratory for Mechanical Behavior of Materials & School of Materials Science  
and Engineering, Xi'an Jiaotong University, Xi'an 710049, China

<sup>b</sup>Ji Hua Laboratory, Foshan, 510006, Guangdong, China

<sup>c</sup>The Key Lab of Micro-nano Electronics and System Integration of Xi'an City & School of  
Microelectronics, Xi'an Jiaotong University, Xi'an 710049, China

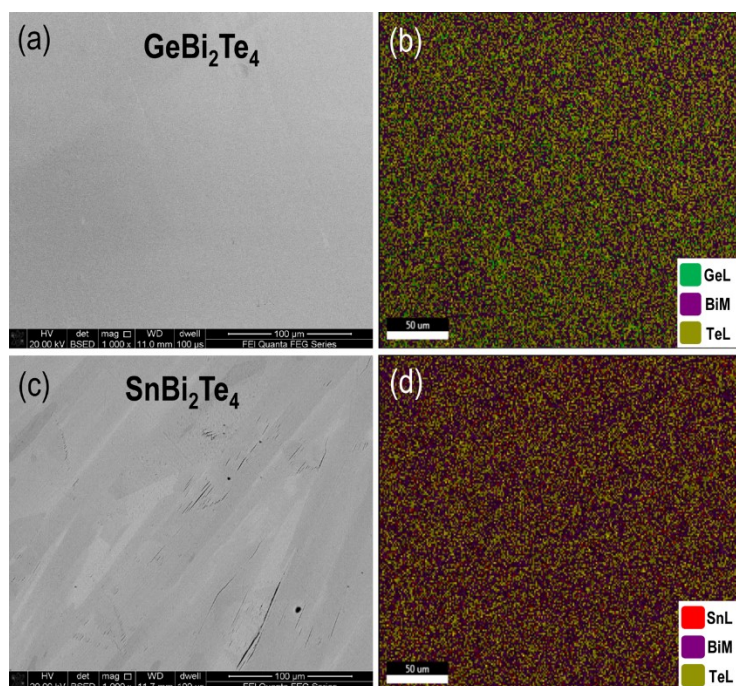

**Fig. S1** Backscattered electron (BSE) images and elemental maps of  $\text{GeBi}_2\text{Te}_4$  and  $\text{SnBi}_2\text{Te}_4$  obtained in scanning electron microscope (SEM). The BSE-SEM images

\* E-mail: shaobo.mi@xjtu.edu.cn

Fax: +86 (29) 83395679

Tel: +86 (29) 83395023

displayed in (a) and (c) show a morphology of  $\text{GeBi}_2\text{Te}_4$  and  $\text{SnBi}_2\text{Te}_4$  samples. The contrast appeared in (a) and (c) results from the grains of different orientations. The corresponding elemental maps of  $\text{GeBi}_2\text{Te}_4$  and  $\text{SnBi}_2\text{Te}_4$  samples presented in (b) and (d) indicate a homogeneous distribution of constituent elements (Ge, Sn, Bi, and Te) in the samples.

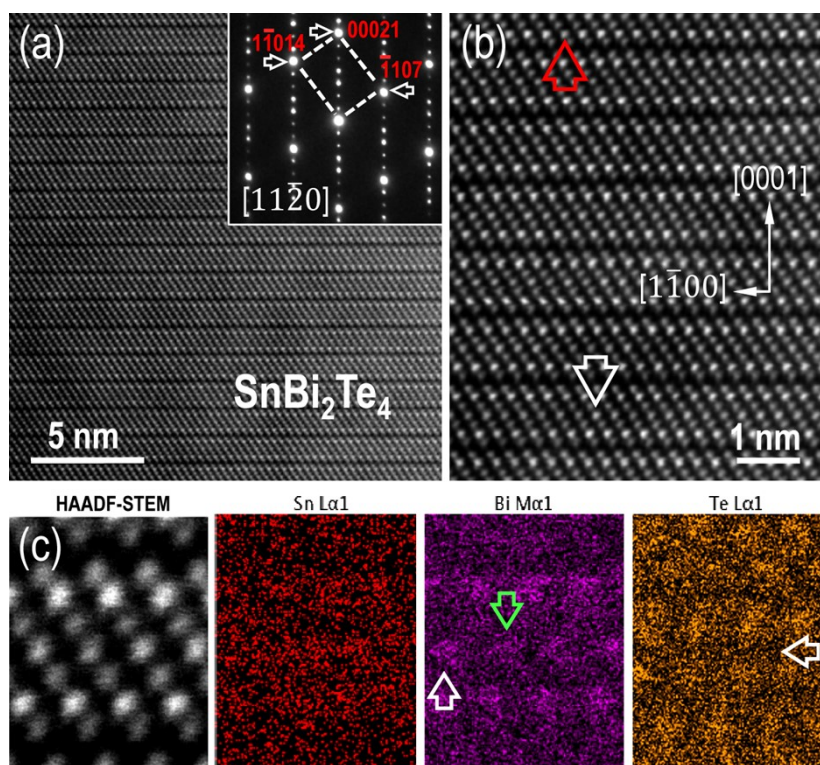

**Fig. S2 The cation disorder in  $\text{SnBi}_2\text{Te}_4$ .** (a, b) HAADF-STEM images of  $\text{SnBi}_2\text{Te}_4$  viewed along the  $[11\bar{2}0]$  zone axis. The insert in (a) is the corresponding SAED pattern. In (b), the intensity variation in the  $3a$  site occupied by Sn, and the  $6c$  site occupied by Bi is demonstrated by a vertical white arrow and a vertical red arrow, respectively. (c) HAADF-STEM image and the atomically resolved EDS maps of Sn-L $\alpha$ 1, Bi-M $\alpha$ 1, and Te-L $\alpha$ 1 of the  $\text{SnBi}_2\text{Te}_4$  sample viewed along the  $[11\bar{2}0]$  zone axis. The intensity fluctuation can be visible in the  $3a$  site, as displayed by a vertical white arrow and a vertical green arrow, indicating the substitution of Sn cations by Bi cations in different ratios. The atomic plane of the  $3a$  site is marked by a horizontal white arrow.
